# Supplementary material for: Electronic and dielectric properties of silicene functionalized with monomers, dimers and trimers of B, C and N atoms
Source: Royal Society of Chemistry journal article supplement (doi:10.1039/c4ra02711f), 2014-01-01
Supplement: c4ra02711f1.pdf [file c4ra02711f1.pdf]

# Electronic & Dielectric Properties of Silicene Functionalized with Monomers, Dimers and Trimers of B, C & N atoms

Brij Mohan, Ashok Kumar and P. K. Ahluwalia

## Supplementary Information

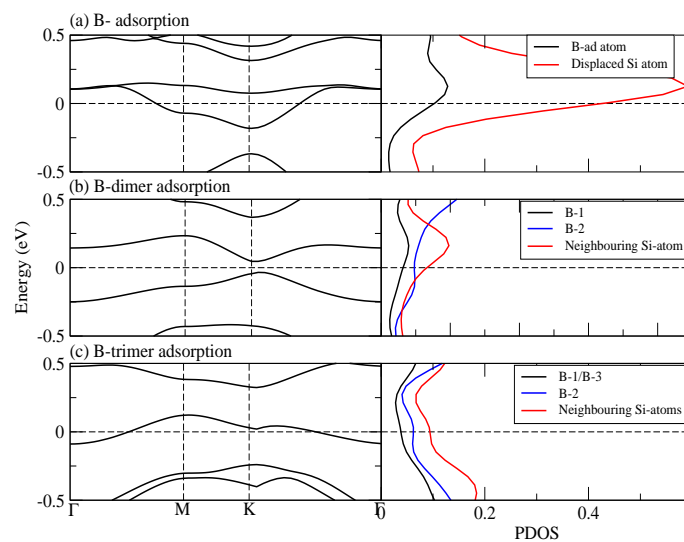

Figure 1: Electronic band structure and corresponding density of state of silicene with adsorption of B monomer, dimer and trimer.

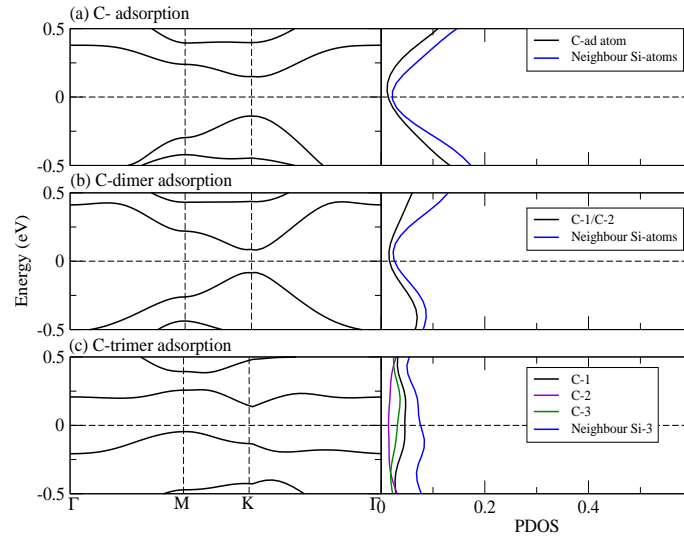

Figure 2: Electronic band structure and corresponding density of state of silicene with adsorption of C monomer, dimer and trimer.

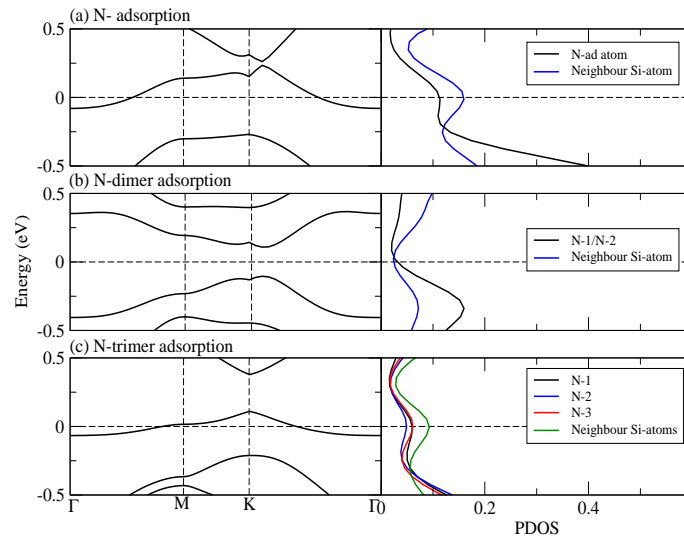

Figure 3: Electronic band structure and corresponding density of state of silicene with adsorption of N monomer, dimer and trimer.

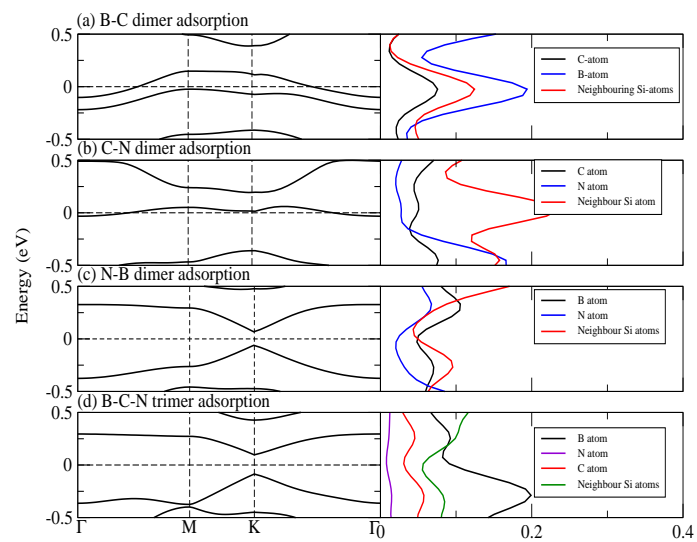

Figure 4: Electronic band structure and corresponding density of state of silicene with adsorption of hetero-dimers and trimer.
